# Supplementary material for: Metabolic Signature of Articular Cartilage Following Mechanical Injury: An Integrated Transcriptomics and Metabolomics Analysis
Source: Front Mol Biosci. 2020 Dec 17;7:592905. doi: 10.3389/fmolb.2020.592905 (PMC7773849; doi:10.3389/fmolb.2020.592905)
Supplement: Supplementary file 4 [file Table_3.xlsx]

## Sheet: Metaboanalyst
Pathway Name	Matched hits	p	-log(p)	Holm p	FDR	Impact	Details	Enriched Metablites (red)
Pentose phosphate pathway	17/22	5.5079e-06	12.109	0.00046267	0.00046267	0.80733	KEGG SMP	alpha-D-Glucose 6-phosphate; Deoxyribose; 2-Deoxy-D-ribose 1-phosphate; 2-Deoxy-D-ribose 5-phosphate; D-Ribose 5-phosphate; alpha-D-Ribose 1-phosphate; D-Ribose; Sedoheptulose 7-phosphate; D-Glyceraldehyde 3-phosphate; D-Ribulose 5-phosphate; beta-D-Fructose 6-phosphate; beta-D-Fructose 1,6-bisphosphate; 6-Phospho-D-gluconate; D-Glucono-1,5-lactone 6-phosphate; beta-D-Glucose 6-phosphate; D-Gluco…
Vitamin B6 metabolism	09/09	1.8637e-05	10.89	0.0015468	0.00078274	1	KEGG SMP	O-Phospho-4-hydroxy-L-threonine; Pyridoxine phosphate; Pyridoxamine phosphate; Pyridoxine; Pyridoxal phosphate; Pyridoxal; Pyridoxamine; 2-Oxo-3-hydroxy-4-phosphobutanoate; 4-Pyridoxate
Tyrosine metabolism	24/42	0.00018954	8.5709	0.015542	0.0041586	0.73401	KEGG SMP SMP	L-Dopachrome; L-Normetanephrine; 3-Methoxy-4-hydroxyphenylglycolaldehyde; L-Noradrenaline; L-Adrenaline; 3,4-Dihydroxymandelate; 3,4-Dihydroxymandelaldehyde; 3,4-Dihydroxyphenylethyleneglycol; L-Metanephrine; Dopamine; 3,4-Dihydroxyphenylacetaldehyde; 3,4-Dihydroxyphenylacetate; 3-Methoxy-4-hydroxyphenylacetaldehyde; 3-Methoxytyramine; 3,4-Dihydroxy-L-phenylalanine; 3,5-Diiodo-L-tyrosine; 3-Iodo-…
Arginine biosynthesis	11/14	0.00023086	8.3737	0.018699	0.0041586	0.68528	KEGG	L-Glutamate; L-Arginine; N-Acetylornithine; N-(L-Arginino)succinate; L-Citrulline; L-Aspartate; Carbamoyl phosphate; L-Ornithine; Ammonia; L-Glutamine; 2-Oxoglutarate; N-Acetyl-L-glutamate; Urea; Fumarate
Pentose and glucuronate interconversions	13/18	0.00024753	8.304	0.019803	0.0041586	0.65624	KEGG	beta-D-Glucuronoside; D-Ribulose 5-phosphate; D-Ribitol 5-phosphate; D-Xylulose; L-Arabitol; Xylitol; L-Gulonate; D-Glucose 1-phosphate; UDP-glucuronate; UDP-glucose; D-Xylose; D-Glucuronate; D-Xylulose 5-phosphate; CDP-ribitol; L-Arabinose; L-Xylulose; 3-Dehydro-L-gulonate; D-Xylonolactone
Purine metabolism	32/65	0.00068547	7.2854	0.054152	0.0095966	0.81392	KEGG SMP	GDP; Xanthine; D-Ribose 5-phosphate; L-Glutamine; 5-Phospho-alpha-D-ribose 1-diphosphate; 5-Phosphoribosylamine; 5'-Phosphoribosylglycinamide; 2-(Formamido)-N1-(5'-phosphoribosyl)acetamidine; 1-(5'-Phosphoribosyl)-5-amino-4-imidazolecarboxamide; 1-(5'-Phosphoribosyl)-5-amino-4-(N-succinocarboxamide)-imidazole; 1-(5-Phospho-D-ribosyl)-5-amino-4-imidazolecarboxylate; 1-(5'-Phosphoribosyl)-5-formami…
Galactose metabolism	16/27	0.0013747	6.5895	0.10723	0.016496	0.593	KEGG SMP	Stachyose; D-Tagatose 6-phosphate; D-Gal alpha 1->6D-Gal alpha 1->6D-Glucose; Sucrose; Raffinose; Melibiose; D-Galactose; 3-beta-D-Galactosyl-sn-glycerol; Epimelibiose; Melibiitol; alpha-D-Galactosyl-(1->3)-1D-myo-inositol; alpha-D-Glucose; Lactose; D-Glucose 1-phosphate; UDP-alpha-D-galactose; UDP-glucose; alpha-D-Galactose 1-phosphate; alpha-D-Galactose; alpha-D-Glucose 6-phosphate; D-Tagatose …
Arginine and proline metabolism	0.536410/38	0.0069663	4.9667	0.53641	0.073147	0.6552	KEGG SMP	L-Arginine; N(omega)-Hydroxyarginine; Guanidinoacetate; Creatine; 4-Aminobutanoate; Agmatine; Putrescine; 4-Aminobutyraldehyde; S-Adenosylmethioninamine; S-Adenosyl-L-methionine; Spermidine; N-Acetylputrescine; N4-Acetylaminobutanal; Spermine; trans-3-Hydroxy-L-proline; D-Proline; (4R)-4-Hydroxy-2-oxoglutarate; L-erythro-4-Hydroxyglutamate; L-4-Hydroxyglutamate semialdehyde; L-1-Pyrroline-3-hydro…
Glycolysis / Gluconeogenesis	14/26	0.0089127	4.7203	0.67737	0.083185	0.51928	KEGG SMP SMP	Acetaldehyde; Ethanol; Thiamin diphosphate; Pyruvate; 2-(alpha-Hydroxyethyl)thiamine diphosphate; Enzyme N6-(lipoyl)lysine; Acetyl-CoA; Enzyme N6-(dihydrolipoyl)lysine; (S)-Lactate; Phosphoenolpyruvate; 2-Phospho-D-glycerate; D-Glyceraldehyde 3-phosphate; beta-D-Fructose 1,6-bisphosphate; beta-D-Fructose 6-phosphate; alpha-D-Glucose 6-phosphate; D-Glucose 1-phosphate; beta-D-Glucose 6-phosphate; …
Caffeine metabolism	07/10	0.010369	4.5689	0.77769	0.084806	0.69231	KEGG SMP
Ascorbate and aldarate metabolism	06/08	0.011106	4.5003	0.82181	0.084806	0.5	KEGG	myo-Inositol; UDP-glucose; L-Gulono-1,4-lactone; D-Glucuronolactone; UDP-glucuronate; D-Glucuronate; L-Gulonate; D-Glucarate
Glycine, serine and threonine metabolism	15/33	0.042016	3.1697	1	0.26774	0.54512	KEGG SMP	L-Serine; Choline; Betaine aldehyde; Betaine; Guanidinoacetate; 3-Phospho-D-glycerate; N,N-Dimethylglycine; L-Cystathionine; Glycine; O-Phospho-L-serine; Sarcosine; 5,10-Methylenetetrahydrofolate; L-Threonine; Lipoylprotein; Aminoacetone; D-Glycerate; [Protein]-S8-aminomethyldihydrolipoyllysine; Tetrahydrofolate; Dihydrolipoylprotein; 2-Phospho-D-glycerate; D-Serine; Hydroxypyruvate; Creatine; 3-…
Fructose and mannose metabolism	10/20	0.046866	3.0605	1	0.26774	0.62181	KEGG SMP	D-Sorbitol; D-Fructose; D-Mannose; beta-D-Fructose 2,6-bisphosphate; D-Mannose 6-phosphate; L-Fucose 1-phosphate; GDP-4-dehydro-6-deoxy-D-mannose; GDP-mannose; D-Mannose 1-phosphate; beta-D-Fructose 6-phosphate; D-Glyceraldehyde 3-phosphate; D-Fructose 1-phosphate; D-Glyceraldehyde; beta-D-Fructose 1,6-bisphosphate; 6-Deoxy-L-galactose; L-Fuconate; alpha-D-Glucose; GDP-L-fucose; Glycerone phospha…
Alanine, aspartate and glutamate metabolism	13/28	0.047555	3.0459	1	0.26774	0.47356	KEGG SMP SMP SMP	N-Acetyl-L-aspartate; 2-Oxosuccinamate; L-Aspartate; L-Asparagine; D-Aspartate; N-(L-Arginino)succinate; N6-(1,2-Dicarboxyethyl)-AMP; L-Alanine; Succinate semialdehyde; L-Glutamate; 4-Aminobutanoate; L-Glutamine; Ammonia; 2-Oxoglutaramate; (S)-1-Pyrroline-5-carboxylate; N-Acetylaspartylglutamate; N-Acetylaspartylglutamylglutamate; Citrate; Oxaloacetate; Fumarate; Pyruvate; N-Carbamoyl-L-aspartate…
Pyrimidine metabolism	17/39	0.047811	3.0405	1	0.26774	0.62625	KEGG SMP	UDP; L-Glutamine; Carbamoyl phosphate; (S)-Dihydroorotate; Orotidine 5'-phosphate; UMP; UTP; Uridine; 5,6-Dihydrouracil; 3-Ureidopropionate; CTP; CDP; CMP; Cytidine; dCDP; dCMP; dCTP; Deoxycytidine; dUTP; dUDP; dUMP; Deoxyuridine; dTDP; dTTP; dTMP; Thymidine; Thymine; (R)-5,6-Dihydrothymine; (R)-3-Ureidoisobutyrate; P1,P4-Bis(5'-uridyl) tetraphosphate; 2'-Deoxy-5-hydroxymethylcytidine-5'-diphosph…
D-Arginine and D-ornithine metabolism	03/04	0.083431	2.4837	1	0.43802	0	KEGG	D-Ornithine; D-Arginine; 5-Amino-2-oxopentanoic acid; 5-Guanidino-2-oxopentanoate

## Sheet: Positive_mcg_pathwayanalysis_
pathway	overlap_size	pathway_size	p-value	overlap_EmpiricalCompounds (id)	overlap_features (id)	overlap_features (name)
Urea cycle/amino group metabolism	46	46	0.00142845	E379,E322,E55,E376,E241,E223,E111,E294,E299,E274,E249,E87,E175,E323,E310,E336,E141,E391,E107,E6,E113,E234,E85,E203,E394,E288,E53,E343,E277,E61,E401,E56,E356,E44,E244,E184,E354,E102,E291,E153,E275,E183,E296,E182,E155,E27	C00170,C00086,C00750,C02442/C03711,C00315/CE5586,C00430/C03440/C03341/C01165/C01157/C01110,C02442/C03711,C01026/C01205/C02356/C00334/C03284/C05145,C00099/C00133/C00041/C00213,C00437,C00179,C00763/CE4788/C00148,C03564/C03912,C05589/C00788,C00026,C00101,C01183/C02735/C00483,C00792/C00062,C00122,C00019,C03406,C00402/C00049,C00315/CE5586,C05936/C00408,C00026,C00300,C00077/C00515/C01602/C03943,C01250,…	5-Methylthioadenosine$Urea$Spermine$N-Methyltyramine/N-Methylphenylethanolamine$Spermidine/dehydrospermidine$5-Aminolevulinate; 5-Amino-4-oxopentanoate; 5-Amino-4-oxovaleric acid/cis-4-Hydroxy-D-proline/2-Amino-4-oxopentanoic acid; 2-Amino-4-oxopentanoate/L-Glutamate 5-semialdehyde; L-Glutamate gamma-semialdehyde/trans-4-Hydroxy-L-proline/5-Amino-2-oxopentanoic acid; 5-Amino-2-oxopentanoate; 2-Ox…
Tryptophan metabolism	41	41	0.0025208	E177,E217,E172,E392,E109,E219,E230,E106,E32,E312,E195,E310,E135,E314,E115,E35,E146,E299,E394,E145,E1,E199,E163,E302,E277,E368,E400,E268,E62,E6,E372,E10,E116,E285,E405,E255,E215,E235,E410,E156,E39	C03722/CE6252,C00328/C05647,C00078/C00525,C00632,C00398,C02693,C02693,C00795/C13747/C00221/C00267/C07480/C00031/C00137/C00738/C00095/C00962/C00247/C00984/C00936/C01582/C00159/C02336/C00293/C00124,C00780,C02220,CE5982,C00026,C00398,C10164/C00253,C00078/C00525,C00362/C00020,C03722/CE6252,C00099/C00133/C00041/C00213,C00026,C00051,thbpt4acam/C15522,C00108,C00643,C04409,C05938/C00217/C00025/C00302,C00…	Quinolinate/$L-Kynurenine/Formyl-5-hydroxykynurenamine$L-Tryptophan/D-Tryptophan$3-Hydroxyanthranilate$Tryptamine$Indole-3-acetamide$Indole-3-acetamide$D-Tagatose; lyxo-Hexulose/1,7-Dimethylxanthine; Paraxanthine/beta-D-Glucose/alpha-D-Glucose//D-Glucose/myo-Inositol/D-Hexose/D-Fructose/beta-D-Galactose/L-Sorbose; L-xylo-Hexulose/alpha-D-Galactose//Galactose/D-Mannose/beta-D-Fructose; beta-Fruit …
Glycine, serine, alanine and threonine metabolism	40	40	0.00260482	E34,E332,E118,E246,E223,E197,E349,E104,E294,E138,E157,E239,E318,E310,E288,E91,E53,E35,E184,E394,E145,E216,E391,E277,E341,E397,E174,E366,E265,E6,E244,E186,E309,E229,E291,E267,E81,E102,E299,E336	C00048,C03232,C01005/C02532,C00163/C00424/C05999/C00937/C05235,C00430/C03440/C03341/C01165/C01157/C01110,CE1554,C03214/C00441/C03508,C03451,C01026/C01205/C02356/C00334/C03284/C05145,CE4968/CE4970,C00256/C00186/C00184/C01013/C00577,C03214/C00441/C03508,C05519/C00188,C00026,C00300,C06054,C00077/C00515/C01602/C03943,C00362/C00020,C00300,C00026,C00051,C06055,C00792/C00062,C05938/C00217/C00025/C00302,…	Glyoxylate$3-Phosphohydroxypyruvate$O-Phospho-L-serine/D-O-Phosphoserine$Propionate (n-C3:0)/(S)-Lactaldehyde; L-Lactaldehyde; L-2-Hydroxypropionaldehyde/D-Lactaldehyde/(R)-Lactaldehyde; D-Lactaldehyde; D-2-Hydroxypropionaldehyde/Hydroxyacetone; Acetol; 1-Hydroxy-2-propanone; 2-Ketopropyl alcohol; Acetone alcohol; Pyruvinalcohol; Pyruvic alcohol; Methylketol$5-Aminolevulinate; 5-Amino-4-oxopentan…
Tyrosine metabolism	53	54	0.00714226	E339,E15,E376,E183,E94,E60,E111,E24,E281,E371,E93,E141,E299,E324,E149,E171,E283,E271,E323,E310,E92,E107,E6,E369,E35,E409,E17,E394,E145,E1,E231,E99,E277,E30,E303,E133,E232,E295,E401,E61,E404,E344,E228,E48,E309,E210,E212,E185,E403,E222,E2,E95,E110	C06199,C00015,C02442/C03711,C00547/C00314,C00708,C03758,C02442/C03711,C03758,C00079/CE2172,C07086/C03765,56dihindlcrbxlt,C01183/C02735/C00483,C00099/C00133/C00041/C00213,C05422/C00425/C00417,CE4888/C05578,C01036/C01061,C02505/C02558,C00082/CE2174,C05589/C00788,C00026,glac/C00072/C02670,C00122,C00019,C00544/C05577/C01161,C00362/C00020,C05583/C05582,C00355,C00026,C00051,thbpt4acam/C15522,C05584,C00…	Hordenine; 4-[2-(Dimethylamino)ethyl]phenol$UDP$N-Methyltyramine/N-Methylphenylethanolamine$Norepinephrine/Pyridoxine$Iodide$Dopamine$N-Methyltyramine/N-Methylphenylethanolamine$Dopamine$L-Phenylalanine/$Phenylacetic acid; Benzylformic acid; Phenylacetate; Benzeneacetiic acid/4-Hydroxyphenylacetaldehyde$5,6-Dihydroxyindole-2-carboxylate$N,N-Dimethylaniline N-oxide/Phenylethanolamine; 2-Amino-1-ph…
Arginine and Proline Metabolism	28	28	0.01252	E379,E322,E223,E320,E310,E150,E249,E87,E175,E34,E391,E402,E113,E44,E203,E394,E107,E277,E56,E295,E66,E6,E356,E291,E123,E330,E275,E234	C00170,C00086,C00430/C03440/C03341/C01165/C01157/C01110,C00042/C02170,C00026,C00147,C00179,C00763/CE4788/C00148,C03564/C03912,C00048,C00792/C00062,C02714,C03406,C00134,C05936/C00408,C00026,C00122,C05938/C00217/C00025/C00302,C01137,C00819/C00064/C05100,C00147,C00019,C00327,C00792/C00062,C00147,C00036,C00555,C00402/C00049	5-Methylthioadenosine$Urea$5-Aminolevulinate; 5-Amino-4-oxopentanoate; 5-Amino-4-oxovaleric acid/cis-4-Hydroxy-D-proline/2-Amino-4-oxopentanoic acid; 2-Amino-4-oxopentanoate/L-Glutamate 5-semialdehyde; L-Glutamate gamma-semialdehyde/trans-4-Hydroxy-L-proline/5-Amino-2-oxopentanoic acid; 5-Amino-2-oxopentanoate; 2-Oxo-5-amino-pentanoate; 2-Oxo-5-aminopentanoate; alpha-Keto-delta-aminopentanoate; 2…
Methionine and cysteine metabolism	26	26	0.0170574	E379,E313,E309,E413,E310,E65,E81,E34,E282,E37,E366,E35,E102,E359,E394,E145,E336,E277,E99,E56,E404,E6,E244,E5,E181,E213	C00170,CE5082,C00164/C06002/C00109/C00349/C00232,C05844,C00026,C00542/C02291,C00065/C00740,C00048,C00491,C05522/C00380,C00155,C00362/C00020,C00037,C05844,C00026,C00051,C00101,C05938/C00217/C00025/C00302,C00097,C01137,C00059,C00019,C00266/C00033,C00542/C02291,C01678,C08276	5-Methylthioadenosine$N-acetyl-L-cystathionine$Acetoacetate/(S)-Methylmalonate semialdehyde/2-Oxobutanoate/2-Methyl-3-oxopropanoate; 3-Oxo-2-methylpropanoate; Methylmalonate semialdehyde/Succinate semialdehyde; Succinic semialdehyde; 4-Oxobutanoate$5-L-Glutamyl-taurine$2-Oxoglutarate$Cystathionine/L-Cystathionine$L-Serine/D-Serine$Glyoxylate$L-Cystine; L-Dicysteine; L-alpha-Diamino-beta-dithiolac…
Aspartate and asparagine metabolism	45	46	0.0202504	E322,E55,E295,E234,E309,E394,E248,E294,E152,E274,E311,E151,E87,E241,E310,E315,E53,E377,E41,E321,E44,E85,E203,E357,E145,E35,E391,E277,E99,E373,E27,E290,E356,E363,E402,E244,E223,E291,E33,E75,E381,E275,E102,E330,E155	C00086,C00750,C00819/C00064/C05100,C00402/C00049,C00164/C06002/C00109/C00349/C00232,C00026,C00047,C01026/C01205/C02356/C00334/C03284/C05145,C02571,C00437,C00487,CE1940/CE1939,C00763/CE4788/C00148,C00315/CE5586,C00026,C00940/C05572,C00077/C00515/C01602/C03943,C02567,C05829,C02642/C00152,C00134,C00315/CE5586,C05936/C00408,C03415,C00051,C00362/C00020,C00792/C00062,C05938/C00217/C00025/C00302,C00097,…	Urea$Spermine$D-Glutamine; D-2-Aminoglutaramic acid/L-Glutamine/3-Ureidoisobutyrate$D-Aspartate/L-Aspartate$Acetoacetate/(S)-Methylmalonate semialdehyde/2-Oxobutanoate/2-Methyl-3-oxopropanoate; 3-Oxo-2-methylpropanoate; Methylmalonate semialdehyde/Succinate semialdehyde; Succinic semialdehyde; 4-Oxobutanoate$2-Oxoglutarate$L-Lysine$N,N-Dimethylglycine; Dimethylglycine/D-3-Amino-isobutanoate/(S)-2…
Lysine metabolism	20	20	0.0408369	E399,E6,E394,E320,E311,E385,E277,E308,E264,E397,E167,E248,E102,E20,E252,E203,E310,E156,E35,E130	C00318,C00019,C00026,C00042/C02170,C00487,C00956,C05938/C00217/C00025/C00302,C03793,C01211,C00248,C01149,C00047,C00037,C00450/C04092,C00450/C04092,C05936/C00408,C00026,C00322,C00362/C00020,C00450/C04092	L-Carnitine$S-Adenosyl-L-methionine$2-Oxoglutarate$Succinate/Methylmalonate; Methylmalonic acid$Carnitine; gamma-Trimethyl-hydroxybutyrobetaine; 3-Hydroxy-4-trimethylammoniobutanoate$L-2-Aminoadipate; L-alpha-Aminoadipate; L-alpha-Aminoadipic acid; L-2-Aminoadipic acid; L-2-Aminohexanedioate$L-4-Hydroxyglutamate semialdehyde/D-Glutamate; D-Glutamic acid; D-Glutaminic acid; D-2-Aminoglutaric acid/…
Alanine and Aspartate Metabolism	19	19	0.0460466	E299,E394,E244,E105,E35,E330,E295,E391,E277,E291,E34,E315,E102,E107,E356,E310,E113,E234,E321	C00099/C00133/C00041/C00213,C00026,C00266/C00033,C05520/C01042/C01045,C00362/C00020,C00036,C00819/C00064/C05100,C00792/C00062,C05938/C00217/C00025/C00302,C00792/C00062,C00048,C00940/C05572,C00037,C00122,C00327,C00026,C03406,C00402/C00049,C02642/C00152	beta-Alanine/D-Alanine/L-Alanine/Sarcosine; N-Methylglycine$2-Oxoglutarate$Glycolaldehyde/Acetate$2-Amino-3-oxoadipate; 2-Amino-3-oxohexanedioic acid/N-Acetyl-L-aspartate/N-Formyl-L-glutamate$dGMP/AMP$Oxaloacetate$D-Glutamine; D-2-Aminoglutaramic acid/L-Glutamine/3-Ureidoisobutyrate$D-Arginine; D-2-Amino-5-guanidinovaleric acid/L-Arginine$L-4-Hydroxyglutamate semialdehyde/D-Glutamate; D-Glutamic …
Butanoate metabolism	17	17	0.0613394	E273,E394,E244,E320,E317,E346,E383,E277,E310,E267,E309,E8,E190,E35,E57,E242,E294	,C00026,C00266/C00033,C00042/C02170,,,,C05938/C00217/C00025/C00302,C00026,C00431/C00183/C00719,C00164/C06002/C00109/C00349/C00232,,,C00362/C00020,,,C01026/C01205/C02356/C00334/C03284/C05145	$2-Oxoglutarate$Glycolaldehyde/Acetate$Succinate/Methylmalonate; Methylmalonic acid$$$$L-4-Hydroxyglutamate semialdehyde/D-Glutamate; D-Glutamic acid; D-Glutaminic acid; D-2-Aminoglutaric acid/L-Glutamate/DL-Glutamate; DL-Glutaminic acid; 2-Aminoglutaric acid; Glutamate$2-Oxoglutarate$5-Aminopentanoate; 5-Aminopentanoic acid; 5-Aminovaleric acid/L-Valine/Glycine betaine$Acetoacetate/(S)-Methylmal…
Glycolysis and Gluconeogenesis	14	14	0.0965465	E8,E244,E330,E187,E136,E300,E350,E397,E157,E35,E50,E186,E155,E106	,C00266/C00033,C00036,,,,,C00248,C00256/C00186/C00184/C01013/C00577,C00362/C00020,,C00631/C00197,C00169,C00795/C13747/C00221/C00267/C07480/C00031/C00137/C00738/C00095/C00962/C00247/C00984/C00936/C01582/C00159/C02336/C00293/C00124	$Glycolaldehyde/Acetate$Oxaloacetate$$$$$Lipoamide; Thioctic acid amide$D-Lactate/L-Lactate/Dihydroxyacetone/3-Hydroxypropanoate; 3-Hydroxypropanoic acid; 3-Hydroxypropionate; 3-Hydroxypropionic acid; Hydracrylic acid/D-Glyceraldehyde$dGMP/AMP$$D-Glycerate 2-phosphate/3-Phospho-D-glycerate$Carbamoyl phosphate$D-Tagatose; lyxo-Hexulose/1,7-Dimethylxanthine; Paraxanthine/beta-D-Glucose/alpha-D-Gluc…
Valine, leucine and isoleucine degradation	13	13	0.109655	E394,E320,E67,E277,E310,E267,E309,E397,E289,E35,E287,E294,E316	C00026,C00042/C02170,,C05938/C00217/C00025/C00302,C00026,C00431/C00183/C00719,C00164/C06002/C00109/C00349/C00232,C00248,,C00362/C00020,,C01026/C01205/C02356/C00334/C03284/C05145,	2-Oxoglutarate$Succinate/Methylmalonate; Methylmalonic acid$$L-4-Hydroxyglutamate semialdehyde/D-Glutamate; D-Glutamic acid; D-Glutaminic acid; D-2-Aminoglutaric acid/L-Glutamate/DL-Glutamate; DL-Glutaminic acid; 2-Aminoglutaric acid; Glutamate$2-Oxoglutarate$5-Aminopentanoate; 5-Aminopentanoic acid; 5-Aminovaleric acid/L-Valine/Glycine betaine$Acetoacetate/(S)-Methylmalonate semialdehyde/2-Oxobu…
Glutamate metabolism	12	12	0.125956	E299,E394,E320,E145,E277,E175,E75,E309,E295,E310,E155,E294	C00099/C00133/C00041/C00213,C00026,C00042/C02170,C00051,C05938/C00217/C00025/C00302,C03564/C03912,C00669,C00164/C06002/C00109/C00349/C00232,C00819/C00064/C05100,C00026,C00169,C01026/C01205/C02356/C00334/C03284/C05145	beta-Alanine/D-Alanine/L-Alanine/Sarcosine; N-Methylglycine$2-Oxoglutarate$Succinate/Methylmalonate; Methylmalonic acid$Reduced glutathione$L-4-Hydroxyglutamate semialdehyde/D-Glutamate; D-Glutamic acid; D-Glutaminic acid; D-2-Aminoglutaric acid/L-Glutamate/DL-Glutamate; DL-Glutaminic acid; 2-Aminoglutaric acid; Glutamate$1-Pyrroline-2-carboxylate; 1-Pyrroline-2-carboxylic acid; delta1-Pyrroline …
Prostaglandin formation from arachidonate	11	11	0.14671	E29,E298,E247,E145,E72,E324,E92,E54,E137,E370,E35	,,,C00051,,C05422/C00425/C00417,glac/C00072/C02670,,,,C00362/C00020	$$$Reduced glutathione$$Dehydroascorbate/Dehydroascorbate/cis-Aconitate; cis-Aconitic acid$D-glucurono-6,3-lactone/L-Ascorbate/D-glucurono-6,3-lactone$$$$dGMP/AMP
Pyruvate Metabolism	10	10	0.168221	E157,E244,E145,E330,E246,E307,E104,E300,E50,E352	C00256/C00186/C00184/C01013/C00577,C00266/C00033,C00051,C00036,C00163/C00424/C05999/C00937/C05235,,C03451,,,	D-Lactate/L-Lactate/Dihydroxyacetone/3-Hydroxypropanoate; 3-Hydroxypropanoic acid; 3-Hydroxypropionate; 3-Hydroxypropionic acid; Hydracrylic acid/D-Glyceraldehyde$Glycolaldehyde/Acetate$Reduced glutathione$Oxaloacetate$Propionate (n-C3:0)/(S)-Lactaldehyde; L-Lactaldehyde; L-2-Hydroxypropionaldehyde/D-Lactaldehyde/(R)-Lactaldehyde; D-Lactaldehyde; D-2-Hydroxypropionaldehyde/Hydroxyacetone; Acetol;…
Vitamin B6 (pyridoxine) metabolism	10	10	0.168221	E112,E63,E329,E408,E61,E238,E201,E140,E142,E183	,,,,C00547/C00314,,,,,C00547/C00314	$$$$Norepinephrine/Pyridoxine$$$$$Norepinephrine/Pyridoxine
Drug metabolism - cytochrome P450	10	10	0.168221	E390,E97,E108,E83,E226,E361,E49,E143,E192,E250	,,,,,,,,,	$$$$$$$$$
Glyoxylate and Dicarboxylate Metabolism	9	9	0.19074	E22,E244,E341,E122,E186,E300,E174,E147,E34	,C00266/C00033,C00168/C01146,,C00631/C00197,,C00160,,C00048	$Glycolaldehyde/Acetate$Hydroxypyruvate/2-Hydroxy-3-oxopropanoate; Tartronate semialdehyde$$D-Glycerate 2-phosphate/3-Phospho-D-glycerate$$Glycolate$$Glyoxylate
Pentose and Glucuronate Interconversions	8	8	0.221578	E22,E15,E305,E236,E122,E134,E374,E125	,C00015,,,,,,C16356	$UDP$$$$$$1,7-Dimethyluric acid
Porphyrin metabolism	8	8	0.221578	E398,E105,E15,E236,E324,E223,E92,E102	,C05520/C01042/C01045,C00015,,C05422/C00425/C00417,C00430/C03440/C03341/C01165/C01157/C01110,glac/C00072/C02670,C00037	$2-Amino-3-oxoadipate; 2-Amino-3-oxohexanedioic acid/N-Acetyl-L-aspartate/N-Formyl-L-glutamate$UDP$$Dehydroascorbate/Dehydroascorbate/cis-Aconitate; cis-Aconitic acid$5-Aminolevulinate; 5-Amino-4-oxopentanoate; 5-Amino-4-oxovaleric acid/cis-4-Hydroxy-D-proline/2-Amino-4-oxopentanoic acid; 2-Amino-4-oxopentanoate/L-Glutamate 5-semialdehyde; L-Glutamate gamma-semialdehyde/trans-4-Hydroxy-L-proline/…
Fructose and mannose metabolism	8	8	0.221578	E157,E350,E233,E300,E12,E64,E325,E106	C00256/C00186/C00184/C01013/C00577,,,,,,,C00795/C13747/C00221/C00267/C07480/C00031/C00137/C00738/C00095/C00962/C00247/C00984/C00936/C01582/C00159/C02336/C00293/C00124	D-Lactate/L-Lactate/Dihydroxyacetone/3-Hydroxypropanoate; 3-Hydroxypropanoic acid; 3-Hydroxypropionate; 3-Hydroxypropionic acid; Hydracrylic acid/D-Glyceraldehyde$$$$$$$D-Tagatose; lyxo-Hexulose/1,7-Dimethylxanthine; Paraxanthine/beta-D-Glucose/alpha-D-Glucose//D-Glucose/myo-Inositol/D-Hexose/D-Fructose/beta-D-Galactose/L-Sorbose; L-xylo-Hexulose/alpha-D-Galactose//Galactose/D-Mannose/beta-D-Fruc…
Selenoamino acid metabolism	7	7	0.259306	E299,E329,E336,E309,E81,E201,E35	C00099/C00133/C00041/C00213,,C00101,C00164/C06002/C00109/C00349/C00232,C00065/C00740,,C00362/C00020	beta-Alanine/D-Alanine/L-Alanine/Sarcosine; N-Methylglycine$$5,6,7,8-Tetrahydrofolate$Acetoacetate/(S)-Methylmalonate semialdehyde/2-Oxobutanoate/2-Methyl-3-oxopropanoate; 3-Oxo-2-methylpropanoate; Methylmalonate semialdehyde/Succinate semialdehyde; Succinic semialdehyde; 4-Oxobutanoate$L-Serine/D-Serine$$dGMP/AMP
Glutathione Metabolism	7	7	0.259306	E299,E145,E277,E99,E75,E102,E380	C00099/C00133/C00041/C00213,C00051,C05938/C00217/C00025/C00302,C00097,C00669,C00037,	beta-Alanine/D-Alanine/L-Alanine/Sarcosine; N-Methylglycine$Reduced glutathione$L-4-Hydroxyglutamate semialdehyde/D-Glutamate; D-Glutamic acid; D-Glutaminic acid; D-2-Aminoglutaric acid/L-Glutamate/DL-Glutamate; DL-Glutaminic acid; 2-Aminoglutaric acid; Glutamate$L-Cysteine$gamma-L-Glutamyl-L-cysteine$Glycine$
Sialic acid metabolism	7	7	0.259306	E170,E350,E187,E81,E79,E360,E106	,,,C00065/C00740,,,C00795/C13747/C00221/C00267/C07480/C00031/C00137/C00738/C00095/C00962/C00247/C00984/C00936/C01582/C00159/C02336/C00293/C00124	$$$L-Serine/D-Serine$$$D-Tagatose; lyxo-Hexulose/1,7-Dimethylxanthine; Paraxanthine/beta-D-Glucose/alpha-D-Glucose//D-Glucose/myo-Inositol/D-Hexose/D-Fructose/beta-D-Galactose/L-Sorbose; L-xylo-Hexulose/alpha-D-Galactose//Galactose/D-Mannose/beta-D-Fructose; beta-Fruit sugar; beta-D-arabino-Hexulose; beta-Levulose; Fructose/Glucose/D-Galactose
Propanoate metabolism	7	7	0.259306	E157,E309,E330,E260,E293,E246,E35	C00256/C00186/C00184/C01013/C00577,C00164/C06002/C00109/C00349/C00232,C00036,,,C00163/C00424/C05999/C00937/C05235,C00362/C00020	D-Lactate/L-Lactate/Dihydroxyacetone/3-Hydroxypropanoate; 3-Hydroxypropanoic acid; 3-Hydroxypropionate; 3-Hydroxypropionic acid; Hydracrylic acid/D-Glyceraldehyde$Acetoacetate/(S)-Methylmalonate semialdehyde/2-Oxobutanoate/2-Methyl-3-oxopropanoate; 3-Oxo-2-methylpropanoate; Methylmalonate semialdehyde/Succinate semialdehyde; Succinic semialdehyde; 4-Oxobutanoate$Oxaloacetate$$$Propionate (n-C3:0)…
Carbon fixation	7	7	0.259306	E374,E330,E300,E350,E187,E234,E220	,C00036,,,,C00402/C00049,	$Oxaloacetate$$$$D-Aspartate/L-Aspartate$
Vitamin A (retinol) metabolism	7	7	0.259306	E73,E15,E412,E225,E7,E370,E35	,C00015,,,,,C00362/C00020	$UDP$$$$$dGMP/AMP
Pyrimidine metabolism	31	33	0.267372	E286,E31,E15,E148,E295,E353,E309,E374,E47,E4,E294,E299,E28,E154,E305,E21,E158,E37,E206,E35,E88,E350,E277,E187,E348,E321,E52,E45,E166,E234,E155	,,C00015,,C00819/C00064/C05100,,C00164/C06002/C00109/C00349/C00232,,,,C01026/C01205/C02356/C00334/C03284/C05145,C00099/C00133/C00041/C00213,,,,,,C05522/C00380,,C00362/C00020,,,C05938/C00217/C00025/C00302,,,C02642/C00152,,,,C00402/C00049,C00169	$$UDP$$D-Glutamine; D-2-Aminoglutaramic acid/L-Glutamine/3-Ureidoisobutyrate$$Acetoacetate/(S)-Methylmalonate semialdehyde/2-Oxobutanoate/2-Methyl-3-oxopropanoate; 3-Oxo-2-methylpropanoate; Methylmalonate semialdehyde/Succinate semialdehyde; Succinic semialdehyde; 4-Oxobutanoate$$$$N,N-Dimethylglycine; Dimethylglycine/D-3-Amino-isobutanoate/(S)-2-Aminobutanoate; (S)-2-Aminobutanoic acid; (S)-2-Am…
Pentose phosphate pathway	18	19	0.278632	E388,E374,E77,E35,E350,E84,E4,E122,E300,E3,E22,E106,E348,E68,E360,E325,E125,E220	,,,C00362/C00020,,,,,,,,C00795/C13747/C00221/C00267/C07480/C00031/C00137/C00738/C00095/C00962/C00247/C00984/C00936/C01582/C00159/C02336/C00293/C00124,,,,,C16356,	$$$dGMP/AMP$$$$$$$$D-Tagatose; lyxo-Hexulose/1,7-Dimethylxanthine; Paraxanthine/beta-D-Glucose/alpha-D-Glucose//D-Glucose/myo-Inositol/D-Hexose/D-Fructose/beta-D-Galactose/L-Sorbose; L-xylo-Hexulose/alpha-D-Galactose//Galactose/D-Mannose/beta-D-Fructose; beta-Fruit sugar; beta-D-arabino-Hexulose; beta-Levulose; Fructose/Glucose/D-Galactose$$$$$1,7-Dimethyluric acid$
Heparan sulfate degradation	6	6	0.298714	E170,E22,E236,E122,E404,E106	,,,,C00059,C00795/C13747/C00221/C00267/C07480/C00031/C00137/C00738/C00095/C00962/C00247/C00984/C00936/C01582/C00159/C02336/C00293/C00124	$$$$Sulfate$D-Tagatose; lyxo-Hexulose/1,7-Dimethylxanthine; Paraxanthine/beta-D-Glucose/alpha-D-Glucose//D-Glucose/myo-Inositol/D-Hexose/D-Fructose/beta-D-Galactose/L-Sorbose; L-xylo-Hexulose/alpha-D-Galactose//Galactose/D-Mannose/beta-D-Fructose; beta-Fruit sugar; beta-D-arabino-Hexulose; beta-Levulose; Fructose/Glucose/D-Galactose
Chondroitin sulfate degradation	6	6	0.298714	E170,E22,E236,E122,E404,E106	,,,,C00059,C00795/C13747/C00221/C00267/C07480/C00031/C00137/C00738/C00095/C00962/C00247/C00984/C00936/C01582/C00159/C02336/C00293/C00124	$$$$Sulfate$D-Tagatose; lyxo-Hexulose/1,7-Dimethylxanthine; Paraxanthine/beta-D-Glucose/alpha-D-Glucose//D-Glucose/myo-Inositol/D-Hexose/D-Fructose/beta-D-Galactose/L-Sorbose; L-xylo-Hexulose/alpha-D-Galactose//Galactose/D-Mannose/beta-D-Fructose; beta-Fruit sugar; beta-D-arabino-Hexulose; beta-Levulose; Fructose/Glucose/D-Galactose
N-Glycan biosynthesis	6	6	0.298714	E103,E101,E15,E350,E305,E106	,,C00015,,,C00795/C13747/C00221/C00267/C07480/C00031/C00137/C00738/C00095/C00962/C00247/C00984/C00936/C01582/C00159/C02336/C00293/C00124	$$UDP$$$D-Tagatose; lyxo-Hexulose/1,7-Dimethylxanthine; Paraxanthine/beta-D-Glucose/alpha-D-Glucose//D-Glucose/myo-Inositol/D-Hexose/D-Fructose/beta-D-Galactose/L-Sorbose; L-xylo-Hexulose/alpha-D-Galactose//Galactose/D-Mannose/beta-D-Fructose; beta-Fruit sugar; beta-D-arabino-Hexulose; beta-Levulose; Fructose/Glucose/D-Galactose
Ubiquinone Biosynthesis	5	5	0.350223	E6,E185,E210,E180,E35	C00019,C05350/C01179/C01197,C00166/C05838/C00811/C02763,,C00362/C00020	S-Adenosyl-L-methionine$2-Hydroxy-3-(4-hydroxyphenyl)propenoate; 4-Hydroxy-enol-phenylpyruvate/3-(4-Hydroxyphenyl)pyruvate/Caffeate; Caffeic acid; 3,4-Dihydroxy-trans-cinnamate; trans-Caffeate$Phenylpyruvate/cis-2-Hydroxycinnamate; 2-Coumarinate/4-Coumarate; p-Coumaric acid; trans-4-Hydroxycinnamate; trans-p-Hydroxycinnamate; 4-Hydroxycinnamic acid; 4-Hydroxycinnamate/enol-Phenylpyruvate$$dGMP/AMP
C21-steroid hormone biosynthesis and metabolism	5	5	0.350223	E240,E15,E244,E404,E179	,C00015,C00266/C00033,C00059,	$UDP$Glycolaldehyde/Acetate$Sulfate$
Vitamin B1 (thiamin) metabolism	5	5	0.350223	E11,E394,E156,E35,E310	,C00026,C00322,C00362/C00020,C00026	$2-Oxoglutarate$2-Oxoadipate$dGMP/AMP$2-Oxoglutarate
Keratan sulfate degradation	5	5	0.350223	E12,E170,E404,E106,E15	,,C00059,C00795/C13747/C00221/C00267/C07480/C00031/C00137/C00738/C00095/C00962/C00247/C00984/C00936/C01582/C00159/C02336/C00293/C00124,C00015	$$Sulfate$D-Tagatose; lyxo-Hexulose/1,7-Dimethylxanthine; Paraxanthine/beta-D-Glucose/alpha-D-Glucose//D-Glucose/myo-Inositol/D-Hexose/D-Fructose/beta-D-Galactose/L-Sorbose; L-xylo-Hexulose/alpha-D-Galactose//Galactose/D-Mannose/beta-D-Fructose; beta-Fruit sugar; beta-D-arabino-Hexulose; beta-Levulose; Fructose/Glucose/D-Galactose$UDP
Caffeine metabolism	5	5	0.350223	E198,E77,E106,E125,E126	C16365,,C00795/C13747/C00221/C00267/C07480/C00031/C00137/C00738/C00095/C00962/C00247/C00984/C00936/C01582/C00159/C02336/C00293/C00124,C16356,C16356	5-Acetylamino-6-formylamino-3-methyluracil; AFMU$$D-Tagatose; lyxo-Hexulose/1,7-Dimethylxanthine; Paraxanthine/beta-D-Glucose/alpha-D-Glucose//D-Glucose/myo-Inositol/D-Hexose/D-Fructose/beta-D-Galactose/L-Sorbose; L-xylo-Hexulose/alpha-D-Galactose//Galactose/D-Mannose/beta-D-Fructose; beta-Fruit sugar; beta-D-arabino-Hexulose; beta-Levulose; Fructose/Glucose/D-Galactose$1,7-Dimethyluric acid$1,7-…
Vitamin B3 (nicotinate and nicotinamide) metabolism	15	16	0.355432	E278,E116,E35,E177,E277,E291,E268,E6,E374,E234,E391,E314,E295,E211,E146	,C03722/CE6252,C00362/C00020,C03722/CE6252,C05938/C00217/C00025/C00302,C00792/C00062,C10164/C00253,C00019,,C00402/C00049,C00792/C00062,C10164/C00253,C00819/C00064/C05100,,C03722/CE6252	$Quinolinate/$dGMP/AMP$Quinolinate/$L-4-Hydroxyglutamate semialdehyde/D-Glutamate; D-Glutamic acid; D-Glutaminic acid; D-2-Aminoglutaric acid/L-Glutamate/DL-Glutamate; DL-Glutaminic acid; 2-Aminoglutaric acid; Glutamate$D-Arginine; D-2-Amino-5-guanidinovaleric acid/L-Arginine$/Nicotinate$S-Adenosyl-L-methionine$$D-Aspartate/L-Aspartate$D-Arginine; D-2-Amino-5-guanidinovaleric acid/L-Arginine$/Nic…
Ascorbate (Vitamin C) and Aldarate Metabolism	14	15	0.381481	E29,E145,E46,E202,E23,E260,E236,E324,E293,E407,E92,E147,E360,E125	,C00051,,,,,,C05422/C00425/C00417,,,glac/C00072/C02670,,,C16356	$Reduced glutathione$$$$$$Dehydroascorbate/Dehydroascorbate/cis-Aconitate; cis-Aconitic acid$$$D-glucurono-6,3-lactone/L-Ascorbate/D-glucurono-6,3-lactone$$$1,7-Dimethyluric acid
Drug metabolism - other enzymes	4	4	0.402487	E351,E340,E40,E131	,C07054,,	$Isoniazid$$
Nitrogen metabolism	4	4	0.402487	E321,E277,E234,E295	C02642/C00152,C05938/C00217/C00025/C00302,C00402/C00049,C00819/C00064/C05100	N-Carbamoyl-beta-alanine/L-Asparagine$L-4-Hydroxyglutamate semialdehyde/D-Glutamate; D-Glutamic acid; D-Glutaminic acid; D-2-Aminoglutaric acid/L-Glutamate/DL-Glutamate; DL-Glutaminic acid; 2-Aminoglutaric acid; Glutamate$D-Aspartate/L-Aspartate$D-Glutamine; D-2-Aminoglutaramic acid/L-Glutamine/3-Ureidoisobutyrate
Starch and Sucrose Metabolism	4	4	0.402487	E350,E305,E106,E15	,,C00795/C13747/C00221/C00267/C07480/C00031/C00137/C00738/C00095/C00962/C00247/C00984/C00936/C01582/C00159/C02336/C00293/C00124,C00015	$$D-Tagatose; lyxo-Hexulose/1,7-Dimethylxanthine; Paraxanthine/beta-D-Glucose/alpha-D-Glucose//D-Glucose/myo-Inositol/D-Hexose/D-Fructose/beta-D-Galactose/L-Sorbose; L-xylo-Hexulose/alpha-D-Galactose//Galactose/D-Mannose/beta-D-Fructose; beta-Fruit sugar; beta-D-arabino-Hexulose; beta-Levulose; Fructose/Glucose/D-Galactose$UDP
D4&E4-neuroprostanes formation	4	4	0.402487	E324,E29,E98,E92	C05422/C00425/C00417,,,glac/C00072/C02670	Dehydroascorbate/Dehydroascorbate/cis-Aconitate; cis-Aconitic acid$$$D-glucurono-6,3-lactone/L-Ascorbate/D-glucurono-6,3-lactone
Bile acid biosynthesis	4	4	0.402487	E246,E208,E102,E35	C00163/C00424/C05999/C00937/C05235,,C00037,C00362/C00020	Propionate (n-C3:0)/(S)-Lactaldehyde; L-Lactaldehyde; L-2-Hydroxypropionaldehyde/D-Lactaldehyde/(R)-Lactaldehyde; D-Lactaldehyde; D-2-Hydroxypropionaldehyde/Hydroxyacetone; Acetol; 1-Hydroxy-2-propanone; 2-Ketopropyl alcohol; Acetone alcohol; Pyruvinalcohol; Pyruvic alcohol; Methylketol$$Glycine$dGMP/AMP
Alkaloid biosynthesis II	4	4	0.402487	E327,E395,E35,E380	,,C00362/C00020,	$$dGMP/AMP$
Biopterin metabolism	4	4	0.402487	E281,E271,E211,E1	C00079/CE2172,C00082/CE2174,,thbpt4acam/C15522	L-Phenylalanine/$L-Tyrosine/$$Tetrahydrobiopterin-4a-carbinolamine/Tetrahydrobiopterin-4a-carbinolamine
Androgen and estrogen biosynthesis and metabolism	4	4	0.402487	E15,E404,E145,E6	C00015,C00059,C00051,C00019	UDP$Sulfate$Reduced glutathione$S-Adenosyl-L-methionine
Beta-Alanine metabolism	13	14	0.413663	E299,E157,E55,E275,E277,E310,E373,E294,E394,E85,E265,E241,E234	C00099/C00133/C00041/C00213,C00256/C00186/C00184/C01013/C00577,C00750,C00555,C05938/C00217/C00025/C00302,C00026,C00986,C01026/C01205/C02356/C00334/C03284/C05145,C00026,C00315/CE5586,C02229/C01888/C05665,C00315/CE5586,C00402/C00049	beta-Alanine/D-Alanine/L-Alanine/Sarcosine; N-Methylglycine$D-Lactate/L-Lactate/Dihydroxyacetone/3-Hydroxypropanoate; 3-Hydroxypropanoic acid; 3-Hydroxypropionate; 3-Hydroxypropionic acid; Hydracrylic acid/D-Glyceraldehyde$Spermine$4-Aminobutanal; 4-Aminobutyraldehyde; Butyraldehyde, 4-amino-$L-4-Hydroxyglutamate semialdehyde/D-Glutamate; D-Glutamic acid; D-Glutaminic acid; D-2-Aminoglutaric acid…
Histidine metabolism	13	14	0.413663	E299,E394,E145,E336,E148,E277,E310,E373,E227,E279,E265,E35,E6	C00099/C00133/C00041/C00213,C00026,C00051,C00101,,C05938/C00217/C00025/C00302,C00026,C00986,,,C02229/C01888/C05665,C00362/C00020,C00019	beta-Alanine/D-Alanine/L-Alanine/Sarcosine; N-Methylglycine$2-Oxoglutarate$Reduced glutathione$5,6,7,8-Tetrahydrofolate$$L-4-Hydroxyglutamate semialdehyde/D-Glutamate; D-Glutamic acid; D-Glutaminic acid; D-2-Aminoglutaric acid/L-Glutamate/DL-Glutamate; DL-Glutaminic acid; 2-Aminoglutaric acid; Glutamate$2-Oxoglutarate$1,3-Diaminopropane; Trimethylenediamine; 1,3-Propanediamine; Propane-1,3-diamin…
Purine metabolism	46	50	0.432821	E258,E322,E348,E165,E251,E182,E192,E150,E22,E59,E234,E69,E66,E173,E202,E92,E107,E100,E19,E35,E146,E29,E374,E119,E277,E89,E284,E80,E78,E382,E295,E70,E71,E393,E159,E178,E116,E177,E187,E122,E123,E117,E102,E90,E378,E336	,C00086,,,,C00242,,C00147,,,C00402/C00049,,C00147,,,glac/C00072/C02670,C00122,,,C00362/C00020,C03722/CE6252,,,,C05938/C00217/C00025/C00302,,,,,,C00819/C00064/C05100,,,,,,C03722/CE6252,C03722/CE6252,,,C00147,,C00037,,,C00101	$Urea$$$$Guanine$$Adenine$$$D-Aspartate/L-Aspartate$$Adenine$$$D-glucurono-6,3-lactone/L-Ascorbate/D-glucurono-6,3-lactone$Fumarate$$$dGMP/AMP$Quinolinate/$$$$L-4-Hydroxyglutamate semialdehyde/D-Glutamate; D-Glutamic acid; D-Glutaminic acid; D-2-Aminoglutaric acid/L-Glutamate/DL-Glutamate; DL-Glutaminic acid; 2-Aminoglutaric acid; Glutamate$$$$$$D-Glutamine; D-2-Aminoglutaramic acid/L-Glutamine/3…
TCA cycle	12	13	0.446433	E394,E244,E320,E330,E187,E310,E324,E397,E107,E50,E26,E23	C00026,C00266/C00033,C00042/C02170,C00036,,C00026,C05422/C00425/C00417,C00248,C00122,,,	2-Oxoglutarate$Glycolaldehyde/Acetate$Succinate/Methylmalonate; Methylmalonic acid$Oxaloacetate$$2-Oxoglutarate$Dehydroascorbate/Dehydroascorbate/cis-Aconitate; cis-Aconitic acid$Lipoamide; Thioctic acid amide$Fumarate$$$
Galactose metabolism	12	13	0.446433	E170,E157,E15,E350,E64,E233,E300,E79,E121,E360,E325,E106	,C00256/C00186/C00184/C01013/C00577,C00015,,,,,,,,,C00795/C13747/C00221/C00267/C07480/C00031/C00137/C00738/C00095/C00962/C00247/C00984/C00936/C01582/C00159/C02336/C00293/C00124	$D-Lactate/L-Lactate/Dihydroxyacetone/3-Hydroxypropanoate; 3-Hydroxypropanoic acid; 3-Hydroxypropionate; 3-Hydroxypropionic acid; Hydracrylic acid/D-Glyceraldehyde$UDP$$$$$$$$$D-Tagatose; lyxo-Hexulose/1,7-Dimethylxanthine; Paraxanthine/beta-D-Glucose/alpha-D-Glucose//D-Glucose/myo-Inositol/D-Hexose/D-Fructose/beta-D-Galactose/L-Sorbose; L-xylo-Hexulose/alpha-D-Galactose//Galactose/D-Mannose/beta…
Fatty Acid Metabolism	12	13	0.446433	E152,E399,E221,E188,E272,E290,E262,E79,E58,E38,E387,E13	C02571,C00318,,,,C02571,,,,,,	O-Acetylcarnitine$L-Carnitine$$$$O-Acetylcarnitine$$$$$$
Fatty acid oxidation, peroxisome	3	3	0.470465	E394,E320,E310	C00026,C00042/C02170,C00026	2-Oxoglutarate$Succinate/Methylmalonate; Methylmalonic acid$2-Oxoglutarate
Glycosphingolipid biosynthesis - globoseries	3	3	0.470465	E170,E106,E15	,C00795/C13747/C00221/C00267/C07480/C00031/C00137/C00738/C00095/C00962/C00247/C00984/C00936/C01582/C00159/C02336/C00293/C00124,C00015	$D-Tagatose; lyxo-Hexulose/1,7-Dimethylxanthine; Paraxanthine/beta-D-Glucose/alpha-D-Glucose//D-Glucose/myo-Inositol/D-Hexose/D-Fructose/beta-D-Galactose/L-Sorbose; L-xylo-Hexulose/alpha-D-Galactose//Galactose/D-Mannose/beta-D-Fructose; beta-Fruit sugar; beta-D-arabino-Hexulose; beta-Levulose; Fructose/Glucose/D-Galactose$UDP
N-Glycan Degradation	3	3	0.470465	E12,E170,E106	,,C00795/C13747/C00221/C00267/C07480/C00031/C00137/C00738/C00095/C00962/C00247/C00984/C00936/C01582/C00159/C02336/C00293/C00124	$$D-Tagatose; lyxo-Hexulose/1,7-Dimethylxanthine; Paraxanthine/beta-D-Glucose/alpha-D-Glucose//D-Glucose/myo-Inositol/D-Hexose/D-Fructose/beta-D-Galactose/L-Sorbose; L-xylo-Hexulose/alpha-D-Galactose//Galactose/D-Mannose/beta-D-Fructose; beta-Fruit sugar; beta-D-arabino-Hexulose; beta-Levulose; Fructose/Glucose/D-Galactose
Glycosphingolipid biosynthesis - ganglioseries	3	3	0.470465	E170,E106,E15	,C00795/C13747/C00221/C00267/C07480/C00031/C00137/C00738/C00095/C00962/C00247/C00984/C00936/C01582/C00159/C02336/C00293/C00124,C00015	$D-Tagatose; lyxo-Hexulose/1,7-Dimethylxanthine; Paraxanthine/beta-D-Glucose/alpha-D-Glucose//D-Glucose/myo-Inositol/D-Hexose/D-Fructose/beta-D-Galactose/L-Sorbose; L-xylo-Hexulose/alpha-D-Galactose//Galactose/D-Mannose/beta-D-Fructose; beta-Fruit sugar; beta-D-arabino-Hexulose; beta-Levulose; Fructose/Glucose/D-Galactose$UDP
Hyaluronan Metabolism	3	3	0.470465	E170,E236,E15	,,C00015	$$UDP
Vitamin H (biotin) metabolism	3	3	0.470465	E248,E43,E35	C00047,,C00362/C00020	L-Lysine$$dGMP/AMP
Lipoate metabolism	3	3	0.470465	E293,E260,E248	,,C00047	$$L-Lysine
Glycerophospholipid metabolism	21	23	0.474078	E221,E176,E157,E244,E300,E200,E229,E211,E338,E342,E79,E30,E96,E81,E247,E350,E106,E4,E325,E9,E6	,,C00256/C00186/C00184/C01013/C00577,C00266/C00033,,,C00114,,,,,C00588/C05594,,C00065/C00740,,,C00795/C13747/C00221/C00267/C07480/C00031/C00137/C00738/C00095/C00962/C00247/C00984/C00936/C01582/C00159/C02336/C00293/C00124,,,,C00019	$$D-Lactate/L-Lactate/Dihydroxyacetone/3-Hydroxypropanoate; 3-Hydroxypropanoic acid; 3-Hydroxypropionate; 3-Hydroxypropionic acid; Hydracrylic acid/D-Glyceraldehyde$Glycolaldehyde/Acetate$$$Choline$$$$$Choline phosphate/3-Methoxy-4-hydroxyphenylethyleneglycol$$L-Serine/D-Serine$$$D-Tagatose; lyxo-Hexulose/1,7-Dimethylxanthine; Paraxanthine/beta-D-Glucose/alpha-D-Glucose//D-Glucose/myo-Inositol/D-…
Xenobiotics metabolism	11	12	0.475254	E280,E145,E15,E188,E13,E384,E285,E214,E124,E162,E243	,C00051,C00015,,,,C14789/C00637,,,,	$Reduced glutathione$UDP$$$$/Indole-3-acetaldehyde$$$$
Glycosphingolipid metabolism	10	11	0.496093	E170,E15,E338,E13,E342,E30,E81,E106,E404,E176	,C00015,,,,C00588/C05594,C00065/C00740,C00795/C13747/C00221/C00267/C07480/C00031/C00137/C00738/C00095/C00962/C00247/C00984/C00936/C01582/C00159/C02336/C00293/C00124,C00059,	$UDP$$$$Choline phosphate/3-Methoxy-4-hydroxyphenylethyleneglycol$L-Serine/D-Serine$D-Tagatose; lyxo-Hexulose/1,7-Dimethylxanthine; Paraxanthine/beta-D-Glucose/alpha-D-Glucose//D-Glucose/myo-Inositol/D-Hexose/D-Fructose/beta-D-Galactose/L-Sorbose; L-xylo-Hexulose/alpha-D-Galactose//Galactose/D-Mannose/beta-D-Fructose; beta-Fruit sugar; beta-D-arabino-Hexulose; beta-Levulose; Fructose/Glucose/D-Ga…
Aminosugars metabolism	9	10	0.524662	E170,E244,E15,E350,E277,E96,E3,E295,E187	,C00266/C00033,C00015,,C05938/C00217/C00025/C00302,,,C00819/C00064/C05100,	$Glycolaldehyde/Acetate$UDP$$L-4-Hydroxyglutamate semialdehyde/D-Glutamate; D-Glutamic acid; D-Glutaminic acid; D-2-Aminoglutaric acid/L-Glutamate/DL-Glutamate; DL-Glutaminic acid; 2-Aminoglutaric acid; Glutamate$$$D-Glutamine; D-2-Aminoglutaramic acid/L-Glutamine/3-Ureidoisobutyrate$
Prostaglandin formation from dihomo gama-linoleic acid	2	2	0.549618	E297,E269	,	$
Nucleotide Sugar Metabolism	2	2	0.549618	E350,E206	,	$
Di-unsaturated fatty acid beta-oxidation	2	2	0.549618	E221,E35	,C00362/C00020	$dGMP/AMP
Proteoglycan biosynthesis	2	2	0.549618	E244,E15	C00266/C00033,C00015	Glycolaldehyde/Acetate$UDP
Omega-3 fatty acid metabolism	2	2	0.549618	E189,E35	,C00362/C00020	$dGMP/AMP
Saturated fatty acids beta-oxidation	2	2	0.549618	E399,E13	C00318,	L-Carnitine$
Arachidonic acid metabolism	8	9	0.619528	E298,E145,E277,E72,E79,E102,E137,E35	,C00051,C05938/C00217/C00025/C00302,,,C00037,,C00362/C00020	$Reduced glutathione$L-4-Hydroxyglutamate semialdehyde/D-Glutamate; D-Glutamic acid; D-Glutaminic acid; D-2-Aminoglutaric acid/L-Glutamate/DL-Glutamate; DL-Glutaminic acid; 2-Aminoglutaric acid; Glutamate$$$Glycine$$dGMP/AMP
Hexose phosphorylation	7	8	0.668515	E64,E350,E233,E3,E406,E210,E106	,,,,,C00166/C05838/C00811/C02763,C00795/C13747/C00221/C00267/C07480/C00031/C00137/C00738/C00095/C00962/C00247/C00984/C00936/C01582/C00159/C02336/C00293/C00124	$$$$$Phenylpyruvate/cis-2-Hydroxycinnamate; 2-Coumarinate/4-Coumarate; p-Coumaric acid; trans-4-Hydroxycinnamate; trans-p-Hydroxycinnamate; 4-Hydroxycinnamic acid; 4-Hydroxycinnamate/enol-Phenylpyruvate$D-Tagatose; lyxo-Hexulose/1,7-Dimethylxanthine; Paraxanthine/beta-D-Glucose/alpha-D-Glucose//D-Glucose/myo-Inositol/D-Hexose/D-Fructose/beta-D-Galactose/L-Sorbose; L-xylo-Hexulose/alpha-D-Galactos…
Phosphatidylinositol phosphate metabolism	7	8	0.668515	E244,E15,E350,E13,E236,E79,E106	C00266/C00033,C00015,,,,,C00795/C13747/C00221/C00267/C07480/C00031/C00137/C00738/C00095/C00962/C00247/C00984/C00936/C01582/C00159/C02336/C00293/C00124	Glycolaldehyde/Acetate$UDP$$$$$D-Tagatose; lyxo-Hexulose/1,7-Dimethylxanthine; Paraxanthine/beta-D-Glucose/alpha-D-Glucose//D-Glucose/myo-Inositol/D-Hexose/D-Fructose/beta-D-Galactose/L-Sorbose; L-xylo-Hexulose/alpha-D-Galactose//Galactose/D-Mannose/beta-D-Fructose; beta-Fruit sugar; beta-D-arabino-Hexulose; beta-Levulose; Fructose/Glucose/D-Galactose
Leukotriene metabolism	7	8	0.668515	E298,E145,E277,E72,E102,E137,E35	,C00051,C05938/C00217/C00025/C00302,,C00037,,C00362/C00020	$Reduced glutathione$L-4-Hydroxyglutamate semialdehyde/D-Glutamate; D-Glutamic acid; D-Glutaminic acid; D-2-Aminoglutaric acid/L-Glutamate/DL-Glutamate; DL-Glutaminic acid; 2-Aminoglutaric acid; Glutamate$$Glycine$$dGMP/AMP
Vitamin B9 (folate) metabolism	7	8	0.668515	E105,E69,E277,E164,E336,E81,E102	C05520/C01042/C01045,,C05938/C00217/C00025/C00302,,C00101,C00065/C00740,C00037	2-Amino-3-oxoadipate; 2-Amino-3-oxohexanedioic acid/N-Acetyl-L-aspartate/N-Formyl-L-glutamate$$L-4-Hydroxyglutamate semialdehyde/D-Glutamate; D-Glutamic acid; D-Glutaminic acid; D-2-Aminoglutaric acid/L-Glutamate/DL-Glutamate; DL-Glutaminic acid; 2-Aminoglutaric acid; Glutamate$$5,6,7,8-Tetrahydrofolate$L-Serine/D-Serine$Glycine
Fatty acid activation	13	15	0.704731	E221,E237,E98,E132,E411,E188,E272,E262,E38,E387,E189,E13,E35	,,,,,,,,,,,,C00362/C00020	$$$$$$$$$$$$dGMP/AMP
Omega-6 fatty acid metabolism	1	1	0.709604	E35	C00362/C00020	dGMP/AMP
O-Glycan biosynthesis	1	1	0.709604	E15	C00015	UDP
Dynorphin metabolism	1	1	0.709604	E301
Keratan sulfate biosynthesis	1	1	0.709604	E15	C00015	UDP
Vitamin D	1	1	0.709604	E345
Mono-unsaturated fatty acid beta-oxidation	1	1	0.709604	E35	C00362/C00020	dGMP/AMP
Glycosphingolipid biosynthesis - neolactoseries	1	1	0.709604	E15	C00015	UDP
Carnitine shuttle	1	1	0.709604	E399	C00318	L-Carnitine
C5-Branched dibasic acid metabolism	1	1	0.709604	E328
Glycosylphosphatidylinositol(GPI)-anchor biosynthesis	1	1	0.709604	E350
Blood Group Biosynthesis	1	1	0.709604	E15	C00015	UDP
Glycosphingolipid biosynthesis - lactoseries	1	1	0.709604	E15	C00015	UDP
Vitamin B2 (riboflavin) metabolism	1	1	0.709604	E35	C00362/C00020	dGMP/AMP
Vitamin B12 (cyanocobalamin) metabolism	1	1	0.709604	E6	C00019	S-Adenosyl-L-methionine
Vitamin D3 (cholecalciferol) metabolism	1	1	0.709604	E345
Vitamin E metabolism	5	6	0.726998	E76,E298,E82,E35,E127	,,,C00362/C00020,	$$$dGMP/AMP$
Linoleate metabolism	11	13	0.737669	E29,E221,E334,E145,E15,E375,E266,E92,E254,E120,E355	,,,C00051,C00015,,,glac/C00072/C02670,,,	$$$Reduced glutathione$UDP$$$D-glucurono-6,3-lactone/L-Ascorbate/D-glucurono-6,3-lactone$$$
Vitamin B5 - CoA biosynthesis from pantothenate	3	4	0.776741	E99,E35,E161	C00097,C00362/C00020,	L-Cysteine$dGMP/AMP$
De novo fatty acid biosynthesis	7	9	0.787329	E221,E237,E256,E188,E13,E7,E35	,,,,,,C00362/C00020	$$$$$$dGMP/AMP
CoA Catabolism	2	3	0.796572	E181,E35	C01678,C00362/C00020	Cysteamine; 2-Aminoethanethiol; beta-Aminoethanethiol; beta-Mercaptoethylamine; Mercaptamine; Thioethanolamine$dGMP/AMP
Putative anti-Inflammatory metabolites formation from EPA	5	7	0.805815	E370,E298,E189,E277,E145	,,,C05938/C00217/C00025/C00302,C00051	$$$L-4-Hydroxyglutamate semialdehyde/D-Glutamate; D-Glutamic acid; D-Glutaminic acid; D-2-Aminoglutaric acid/L-Glutamate/DL-Glutamate; DL-Glutaminic acid; 2-Aminoglutaric acid; Glutamate$Reduced glutathione
Phytanic acid peroxisomal oxidation	4	6	0.812705	E394,E320,E35,E310	C00026,C00042/C02170,C00362/C00020,C00026	2-Oxoglutarate$Succinate/Methylmalonate; Methylmalonic acid$dGMP/AMP$2-Oxoglutarate
Squalene and cholesterol biosynthesis	8	11	0.815394	E261,E128,E101,E345,E309,E103,E414,E169	,,,,C00164/C06002/C00109/C00349/C00232,,,	$$$$Acetoacetate/(S)-Methylmalonate semialdehyde/2-Oxobutanoate/2-Methyl-3-oxopropanoate; 3-Oxo-2-methylpropanoate; Methylmalonate semialdehyde/Succinate semialdehyde; Succinic semialdehyde; 4-Oxobutanoate$$$
1- and 2-Methylnaphthalene degradation	0	0	0.82388
Trihydroxycoprostanoyl-CoA beta-oxidation	0	0	0.82388
Sphingolipid metabolism	0	0	0.82388
Geraniol degradation	0	0	0.82388
3-Chloroacrylic acid degradation	0	0	0.82388
Polyunsaturated fatty acid biosynthesis	0	0	0.82388
Glycerolipid metabolism	0	0	0.82388
3-oxo-10R-octadecatrienoate beta-oxidation	0	0	0.82388
Parathio degradation	0	1	0.82388
Electron transport chain	0	0	0.82388
Vitamin K metabolism	0	0	0.82388
Benzoate degradation via CoA ligation	0	0	0.82388
Limonene and pinene degradation	0	0	0.82388
Dimethyl-branched-chain fatty acid mitochondrial beta-oxidation	0	0	0.82388
Atrazine degradation	0	0	0.82388
R Group Synthesis	0	0	0.82388
ROS Detoxification	0	0	0.82388
Glycosaminoglycan degradation	0	0	0.82388
Fatty acid oxidation	0	0	0.82388
Heparan sulfate biosynthesis	0	0	0.82388

## Sheet: Negative_mcg_pathwayanalysis_
pathway	overlap_size	pathway_size	p-value	overlap_EmpiricalCompounds (id)	overlap_features (id)	overlap_features (name)
Galactose metabolism	5	5	0.00109235	E11,E8,E2,E10,E5	C01507/C00794/C01697,C05401,C05394/C01040/C00198,C05394/C01040/C00198,C01507/C00794/C01697	L-Iditol/D-Sorbitol/Galactitol$3-beta-D-Galactosyl-sn-glycerol; Galactosylglycerol$3-Keto-beta-D-galactose/L-Gulono-1,4-lactone; L-Gulono-gamma-lactone; gamma-Gulonolactone; L-Gulonic acid gamma-lactone; L-Gulonolactone/D-Glucono-1,5-lactone; Gluconic lactone; Gluconic acid lactone; 1,5-Gluconolactone; delta-Gluconolactone; D-Gluconolactone; Gluconolactone$3-Keto-beta-D-galactose/L-Gulono-1,4-lac…
Glycine, serine, alanine and threonine metabolism	3	3	0.0114276	E40,E13,E30	C03451,CE2026,CE2026	(R)-S-Lactoylglutathione$3-methylcrotonoylglycine$3-methylcrotonoylglycine
Sialic acid metabolism	3	3	0.0114276	E8,E2,E10	C05401,C05394/C01040/C00198,C05394/C01040/C00198	3-beta-D-Galactosyl-sn-glycerol; Galactosylglycerol$3-Keto-beta-D-galactose/L-Gulono-1,4-lactone; L-Gulono-gamma-lactone; gamma-Gulonolactone; L-Gulonic acid gamma-lactone; L-Gulonolactone/D-Glucono-1,5-lactone; Gluconic lactone; Gluconic acid lactone; 1,5-Gluconolactone; delta-Gluconolactone; D-Gluconolactone; Gluconolactone$3-Keto-beta-D-galactose/L-Gulono-1,4-lactone; L-Gulono-gamma-lactone; g…
Fructose and mannose metabolism	2	2	0.0277288	E11,E5	C01507/C00794/C01697,C01507/C00794/C01697	L-Iditol/D-Sorbitol/Galactitol$L-Iditol/D-Sorbitol/Galactitol
Biopterin metabolism	2	2	0.0277288	E32,E1	CE2705/CE5236,CE2705/CE5236	quinonoid dihydrobiopterin/O2'-4a-cyclic-tetrahydrobiopterin$quinonoid dihydrobiopterin/O2'-4a-cyclic-tetrahydrobiopterin
Drug metabolism - other enzymes	2	2	0.0277288	E9,E3	C07585,C11736/C12739	N-Acetylisoniazid; (N)1-Acetylisoniazid$5-Fluorodeoxyuridine; Floxuridine/5'-Deoxy-5-fluorouridine; Doxifluridine
Tyrosine metabolism	2	2	0.0277288	E21,E35	C16586/CE2173,C05590	2-Phenyl-1,3-propanediol monocarbamate/$HI; Hydroiodic acid; Hydrogen iodide
Glycerophospholipid metabolism	2	2	0.0277288	E8,E24	C05401,C05650	3-beta-D-Galactosyl-sn-glycerol; Galactosylglycerol$Tetrahydropteridine; 5,6,7,8-Tetrahydropteridine
Pentose phosphate pathway	2	2	0.0277288	E2,E10	C05394/C01040/C00198,C05394/C01040/C00198	3-Keto-beta-D-galactose/L-Gulono-1,4-lactone; L-Gulono-gamma-lactone; gamma-Gulonolactone; L-Gulonic acid gamma-lactone; L-Gulonolactone/D-Glucono-1,5-lactone; Gluconic lactone; Gluconic acid lactone; 1,5-Gluconolactone; delta-Gluconolactone; D-Gluconolactone; Gluconolactone$3-Keto-beta-D-galactose/L-Gulono-1,4-lactone; L-Gulono-gamma-lactone; gamma-Gulonolactone; L-Gulonic acid gamma-lactone; L-…
Hexose phosphorylation	2	2	0.0277288	E11,E5	C01507/C00794/C01697,C01507/C00794/C01697	L-Iditol/D-Sorbitol/Galactitol$L-Iditol/D-Sorbitol/Galactitol
Fatty acid activation	2	2	0.0277288	E37,E27	clpnd/dcsptn1,ocdcea/vacc	clupanodonic acid/docosa-4,7,10,13,16-pentaenoic acid (n-6)$octadecenoate (n-C18:1)/vaccenic acid
Xenobiotics metabolism	1	1	0.0867994	E7
Fatty Acid Metabolism	1	1	0.0867994	E27	ocdcea/vacc	octadecenoate (n-C18:1)/vaccenic acid
Valine, leucine and isoleucine degradation	1	1	0.0867994	E41
Urea cycle/amino group metabolism	1	1	0.0867994	E31
Vitamin B9 (folate) metabolism	1	1	0.0867994	E44
Butanoate metabolism	1	1	0.0867994	E23
Drug metabolism - cytochrome P450	1	1	0.0867994	E21	C16586/CE2173	2-Phenyl-1,3-propanediol monocarbamate/
Lipoate metabolism	1	1	0.0867994	E25
Caffeine metabolism	1	1	0.0867994	E6
Vitamin E metabolism	1	1	0.0867994	E34
Squalene and cholesterol biosynthesis	1	1	0.0867994	E16
Aspartate and asparagine metabolism	1	1	0.0867994	E18
Arginine and Proline Metabolism	1	1	0.0867994	E31
Vitamin B3 (nicotinate and nicotinamide) metabolism	1	1	0.0867994	E20
Lysine metabolism	1	1	0.0867994	E31
Prostaglandin formation from dihomo gama-linoleic acid	1	1	0.0867994	E4
Pyruvate Metabolism	1	1	0.0867994	E40	C03451	(R)-S-Lactoylglutathione
Purine metabolism	1	1	0.0867994	E14
Arachidonic acid metabolism	3	4	0.123603	E42,E39,E26	,,	$$
Leukotriene metabolism	3	5	0.259558	E42,E47,E26	,,	$$
Putative anti-Inflammatory metabolites formation from EPA	1	2	0.260902	E42
Tryptophan metabolism	2	4	0.27149	E29,E20	,	$
Ascorbate (Vitamin C) and Aldarate Metabolism	2	4	0.27149	E2,E10	C05394/C01040/C00198,C05394/C01040/C00198	3-Keto-beta-D-galactose/L-Gulono-1,4-lactone; L-Gulono-gamma-lactone; gamma-Gulonolactone; L-Gulonic acid gamma-lactone; L-Gulonolactone/D-Glucono-1,5-lactone; Gluconic lactone; Gluconic acid lactone; 1,5-Gluconolactone; delta-Gluconolactone; D-Gluconolactone; Gluconolactone$3-Keto-beta-D-galactose/L-Gulono-1,4-lactone; L-Gulono-gamma-lactone; gamma-Gulonolactone; L-Gulonic acid gamma-lactone; L-…
Prostaglandin formation from arachidonate	2	4	0.27149	E28,E26	,	$
CoA Catabolism	0	0	0.283674
Saturated fatty acids beta-oxidation	0	0	0.283674
ROS Detoxification	0	0	0.283674
Fatty acid oxidation	0	0	0.283674
Glycosaminoglycan degradation	0	0	0.283674
Vitamin A (retinol) metabolism	0	0	0.283674
De novo fatty acid biosynthesis	0	0	0.283674
Glyoxylate and Dicarboxylate Metabolism	0	0	0.283674
Omega-3 fatty acid metabolism	0	0	0.283674
Androgen and estrogen biosynthesis and metabolism	0	0	0.283674
Vitamin H (biotin) metabolism	0	0	0.283674
Electron transport chain	0	0	0.283674
Blood Group Biosynthesis	0	0	0.283674
Propanoate metabolism	0	0	0.283674
Parathio degradation	0	0	0.283674
Bile acid biosynthesis	0	0	0.283674
Heparan sulfate biosynthesis	0	0	0.283674
Glycosphingolipid biosynthesis - lactoseries	0	0	0.283674
Glycosylphosphatidylinositol(GPI)-anchor biosynthesis	0	0	0.283674
Vitamin B5 - CoA biosynthesis from pantothenate	0	0	0.283674
Histidine metabolism	0	0	0.283674
Vitamin B1 (thiamin) metabolism	0	0	0.283674
Glycosphingolipid biosynthesis - globoseries	0	0	0.283674
Alkaloid biosynthesis II	0	0	0.283674
3-oxo-10R-octadecatrienoate beta-oxidation	0	0	0.283674
Carnitine shuttle	0	0	0.283674
Glycerolipid metabolism	0	0	0.283674
N-Glycan Degradation	0	0	0.283674
Atrazine degradation	0	0	0.283674
Vitamin B12 (cyanocobalamin) metabolism	0	0	0.283674
Beta-Alanine metabolism	0	0	0.283674
Nitrogen metabolism	0	0	0.283674
Aminosugars metabolism	0	0	0.283674
Pyrimidine metabolism	0	0	0.283674
1- and 2-Methylnaphthalene degradation	0	0	0.283674
3-Chloroacrylic acid degradation	0	0	0.283674
Sphingolipid metabolism	0	0	0.283674
TCA cycle	0	0	0.283674
Keratan sulfate biosynthesis	0	0	0.283674
Proteoglycan biosynthesis	0	0	0.283674
Vitamin K metabolism	0	0	0.283674
Heparan sulfate degradation	0	0	0.283674
Glycosphingolipid biosynthesis - neolactoseries	0	0	0.283674
Fatty acid oxidation, peroxisome	0	0	0.283674
Dynorphin metabolism	0	0	0.283674
Mono-unsaturated fatty acid beta-oxidation	0	0	0.283674
Vitamin D	0	0	0.283674
Geraniol degradation	0	0	0.283674
D4&E4-neuroprostanes formation	0	0	0.283674
Polyunsaturated fatty acid biosynthesis	0	0	0.283674
Phytanic acid peroxisomal oxidation	0	0	0.283674
Methionine and cysteine metabolism	0	0	0.283674
Selenoamino acid metabolism	0	0	0.283674
Glutamate metabolism	0	0	0.283674
Phosphatidylinositol phosphate metabolism	0	0	0.283674
Porphyrin metabolism	0	0	0.283674
Benzoate degradation via CoA ligation	0	0	0.283674
Pentose and Glucuronate Interconversions	0	0	0.283674
Vitamin B6 (pyridoxine) metabolism	0	0	0.283674
Dimethyl-branched-chain fatty acid mitochondrial beta-oxidation	0	0	0.283674
O-Glycan biosynthesis	0	0	0.283674
Glycosphingolipid metabolism	0	0	0.283674
Limonene and pinene degradation	0	0	0.283674
Vitamin B2 (riboflavin) metabolism	0	0	0.283674
Hyaluronan Metabolism	0	0	0.283674
Vitamin D3 (cholecalciferol) metabolism	0	0	0.283674
Keratan sulfate degradation	0	0	0.283674
Omega-6 fatty acid metabolism	0	0	0.283674
Trihydroxycoprostanoyl-CoA beta-oxidation	0	0	0.283674
Starch and Sucrose Metabolism	0	0	0.283674
C21-steroid hormone biosynthesis and metabolism	0	1	0.283674
Di-unsaturated fatty acid beta-oxidation	0	0	0.283674
Glycolysis and Gluconeogenesis	0	0	0.283674
N-Glycan biosynthesis	0	0	0.283674
Chondroitin sulfate degradation	0	0	0.283674
R Group Synthesis	0	0	0.283674
Glycosphingolipid biosynthesis - ganglioseries	0	0	0.283674
C5-Branched dibasic acid metabolism	0	0	0.283674
Linoleate metabolism	0	0	0.283674
Glutathione Metabolism	0	0	0.283674
Alanine and Aspartate Metabolism	0	0	0.283674
Ubiquinone Biosynthesis	0	0	0.283674
Carbon fixation	0	0	0.283674
Nucleotide Sugar Metabolism	0	0	0.283674
